# Supplementary material
Source: publisher figshare collection journal article supplement (https://wiley.figshare.com/ndownloader/files/18009914)
Supplement: Supplementary file 1 [file 18009914]

**Figure legends**

**Figure 1: Open field motor activity in the novel environment:** Effects of adolescent escalating low dose Δ9-THC treatment on non-habituated adult male and female rats. A), D) Ambulatory counts, B), E) Vertical counts, C), F) Time spent in the center of the open field box. *: Δ9-THC *vs.* vehicle, p≤0.05, **: Δ9-THC *vs.* vehicle, p≤0.01.

**Figure 2: Habituation profile after repeated placements in the open field:** Effects of adolescent escalating low dose Δ9-THC treatment on A), C) Vertical counts over four consecutive days, B), D) Ambulatory counts over four consecutive days.

*: Δ9-THC *vs.* vehicle, p≤0.05, ** p≤0.01 *** p≤0.001; ^: Day 1 *vs.* Days 2, 3, 4, p≤0.001; $: Day 2 *vs.* Days 3, 4, p≤0.01.

**Figure 3: Οbject location task:** Effects of adolescent escalating low dose Δ9-THC treatment on A) C) Discrimination Index (DI) and B), D) Total time spent exploring the two objects during the habituation phase of the test. *: Δ9-THC *vs.* vehicle, p≤0.05, *** p≤0.001.

**Figure 4: BDNF protein expression levels in the prefrontal cortex and hippocampus of adult male and female rats following adolescent escalating low-dose Δ9-THC treatment.** The optical density of each band was divided by the corresponding b-actin band to yield the corrected band intensity. [PFC: n=8 veh, n=8 Δ9-THC treated rats for males and females respectively, HIP: n=9 veh, n=8 Δ9-THC for males and females respectively] *: Δ9-THC *vs.* vehicle, p≤0.05.

**Figure 5: Region-dependent alterations in the serotonergic profile of both sexes: Serotonergic activity status in adult male and female rats following adolescent escalating low-dose Δ9-THC treatment.** Α), E) 5-HT tissue levels, B), F) 5-HIAA tissue levels, C), G) 5-HIAA/5-HT ratio in the adult PFC and hippocampus.**: Δ9-THC *vs.* vehicle, p≤0.01.

**Figure 6: SERT protein expression levels in adult male and female rats following adolescent escalating low-dose Δ9-THC treatment.** The optical density of each band was divided by the corresponding GAPDH band to yield the corrected band intensity. [PFC: n=8 veh, n=8 Δ9-THC for males and females respectively, HIPP: n=9 veh, n=8 Δ9-THC for males and females respectively].*: Δ9-THC *vs.* vehicle, p≤0.05.
